# Supplementary material for: Rational design of metal-single-atom decorated CaTaO 2 N as multifunctional photocatalysts for water splitting and CO 2 reduction
Source: Royal Society of Chemistry journal article supplement (doi:10.1039/d5cp05040e), 2026-01-01
Supplement: d5cp05040e1.pdf [file d5cp05040e1.pdf]

**Supporting information for:**

**Rational design of metal-single-atom decorated CaTaO<sub>2</sub>N as  
multifunctional photocatalysts for water splitting and CO<sub>2</sub>  
reduction**

Anjie Yue,<sup>a</sup> Huan Zhang,<sup>a</sup> Yue Liu<sup>a</sup> and Xin Zhou<sup>\*b</sup>

<sup>a</sup> *College of Environment and Chemical Engineering, Dalian University, Dalian 116622, Liaoning, China*

<sup>b</sup> *Interdisciplinary Research Center for Biology and Chemistry, Liaoning Normal University, Dalian 116029, P. R. China*

\* Corresponding authors.

E-mail addresses: [xzhou@lnnu.edu.cn](mailto:xzhou@lnnu.edu.cn)

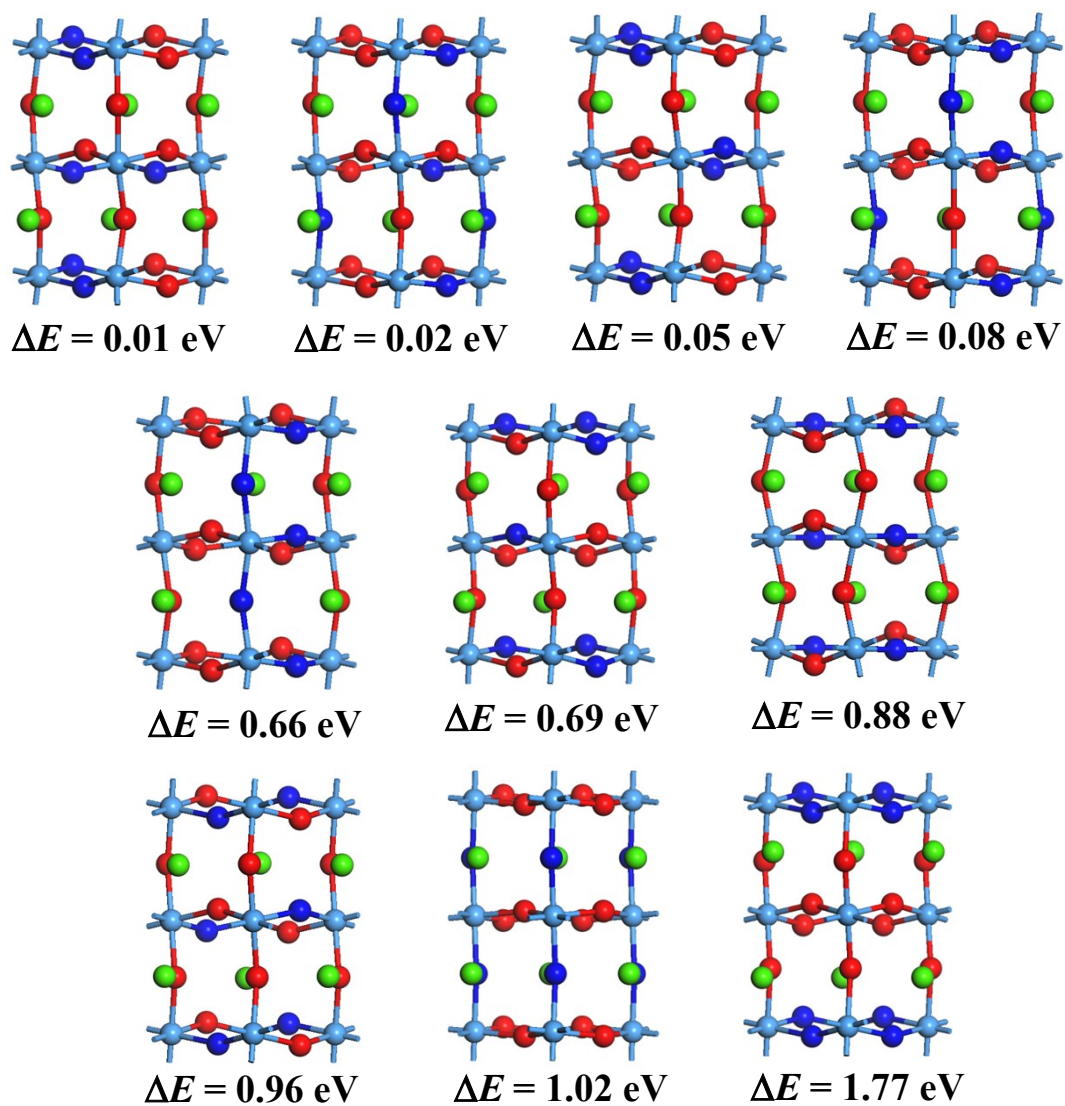

**Fig. S1** Optimized structures with higher energies relative to the most stable structure, along with the relative energy  $\Delta E$ .

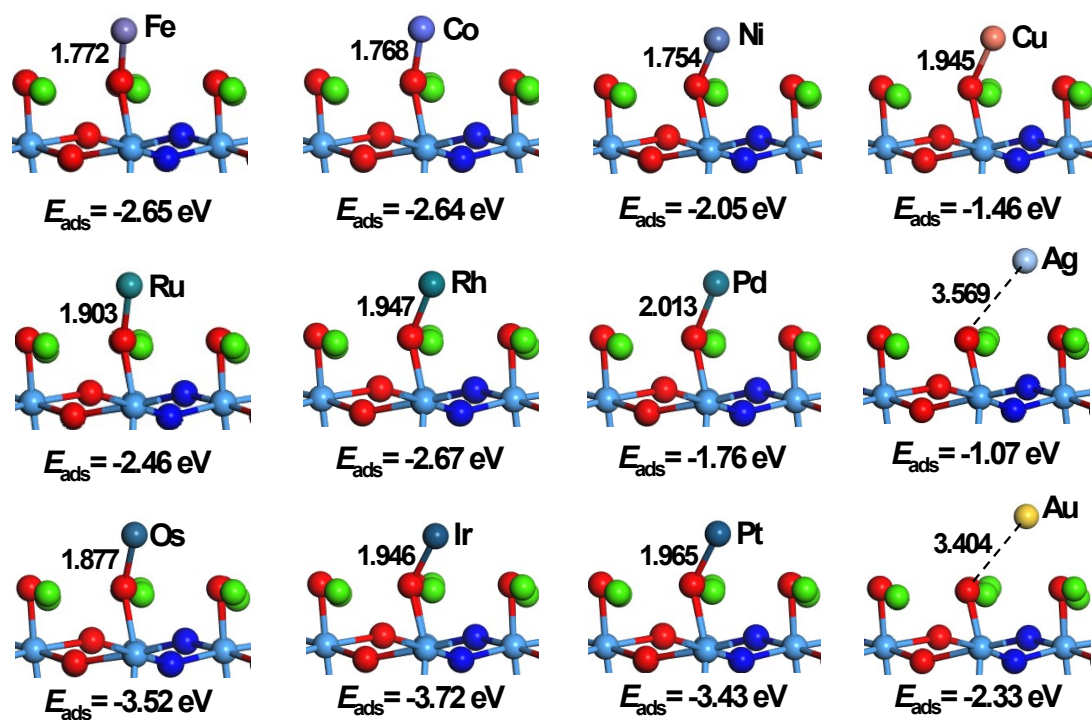

**Fig. S2** Local geometries of optimized adsorption configurations for single metal atoms on the CaO-terminated CaTaO<sub>2</sub>N(010) surface. Bond lengths of newly formed bonds are indicated in the figures, along with the corresponding adsorption energies.

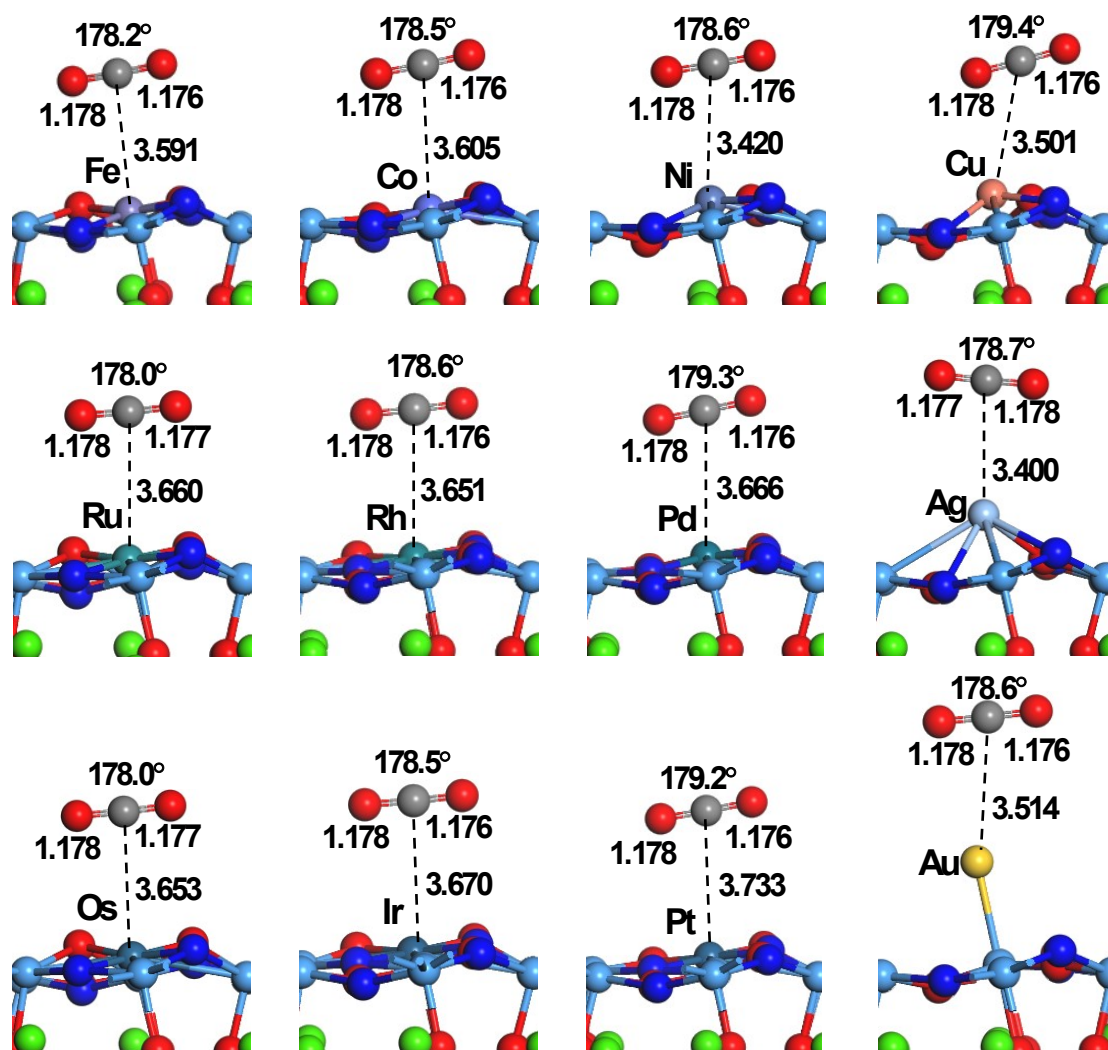

**Fig. S3** Optimized adsorption structures of linear  $^*\text{CO}_2$  on the modeled surfaces, with key structural parameters.

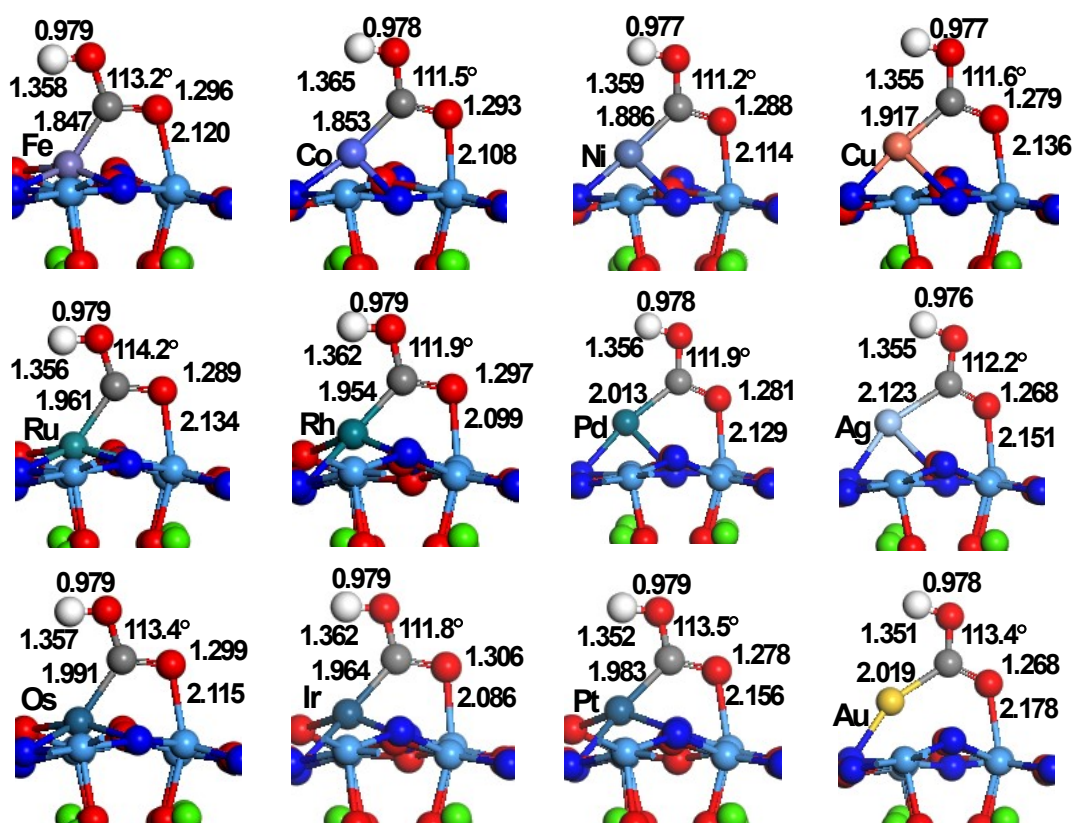

**Fig. S4** Optimized adsorption structures of linear HOOC\* on the modeled surfaces, with key structural parameters.

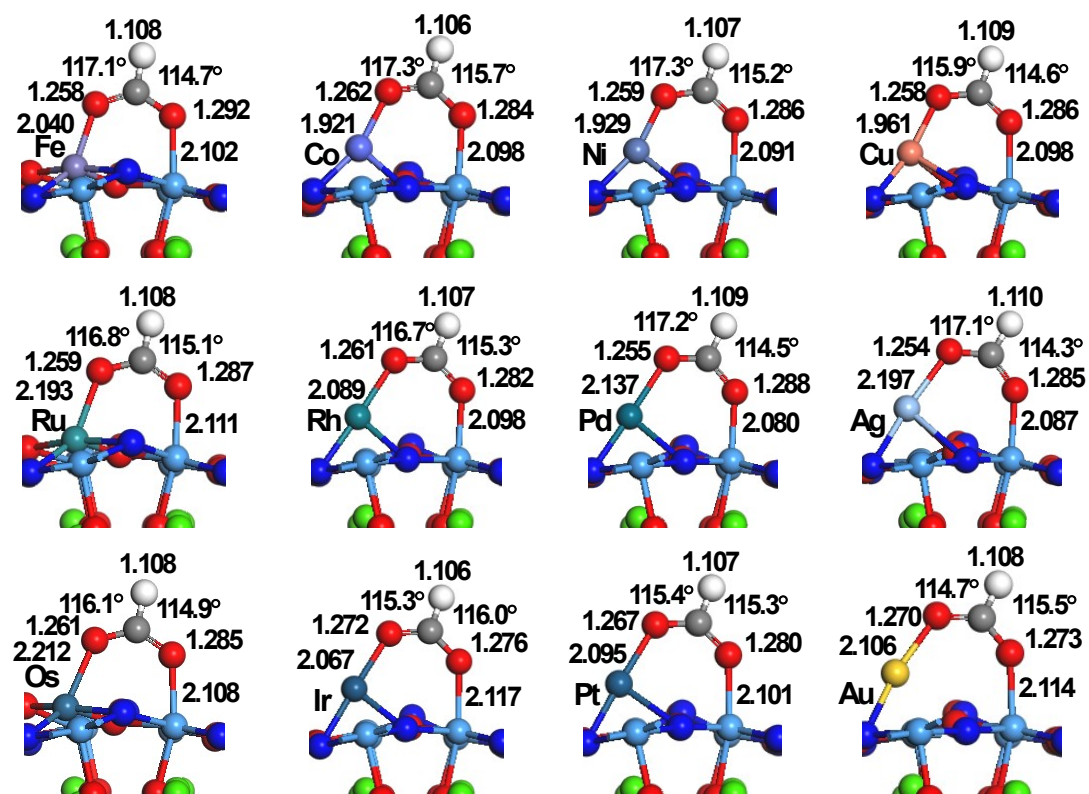

**Fig. S5** Optimized adsorption structures of linear OHCO\* on the modeled surfaces, with key structural parameters.
